# Supplementary material for: Synthesis of carbon-incorporated titanium oxide nanocrystals by pulsed solution plasma: electrical, optical investigation and nanocrystals analysis
Source: Royal Society of Chemistry journal article supplement (doi:10.1039/c4ra15251d), 2014-12-24
Supplement: c4ra15251d1.pdf [file c4ra15251d1.pdf]

### Supporting Information

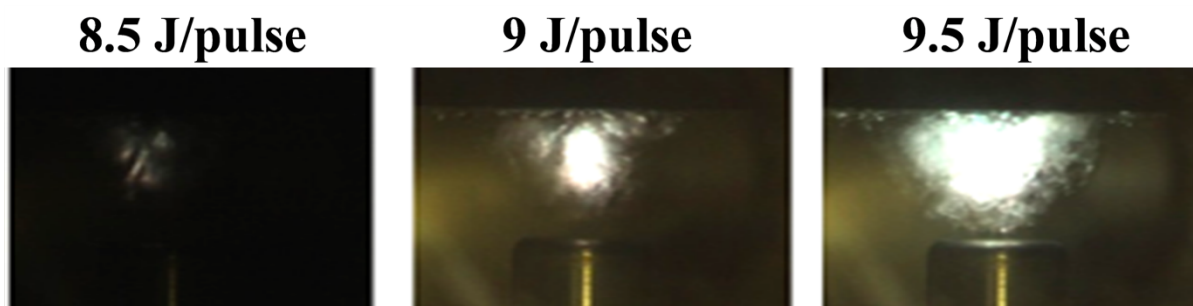

Fig. S1 Discharge photographs for capacitor energy of <10 J.

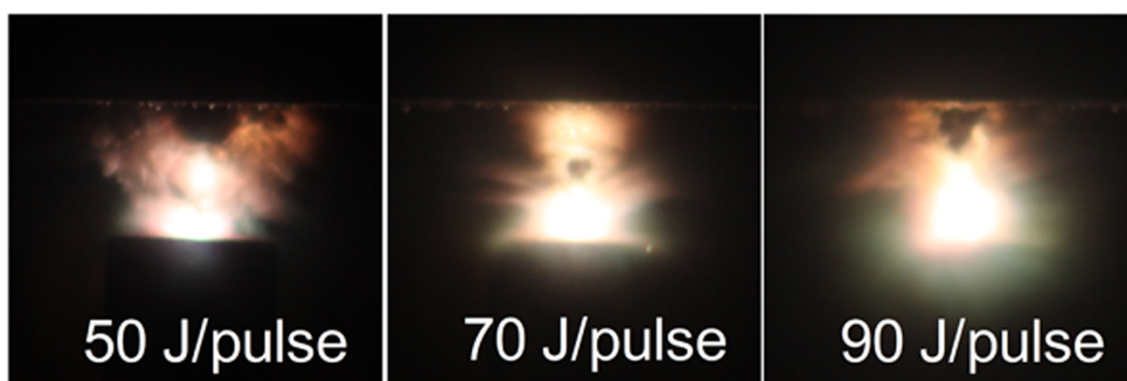

Fig. S2 Discharge photographs for capacitor energy of 50, 70 and 90 J.

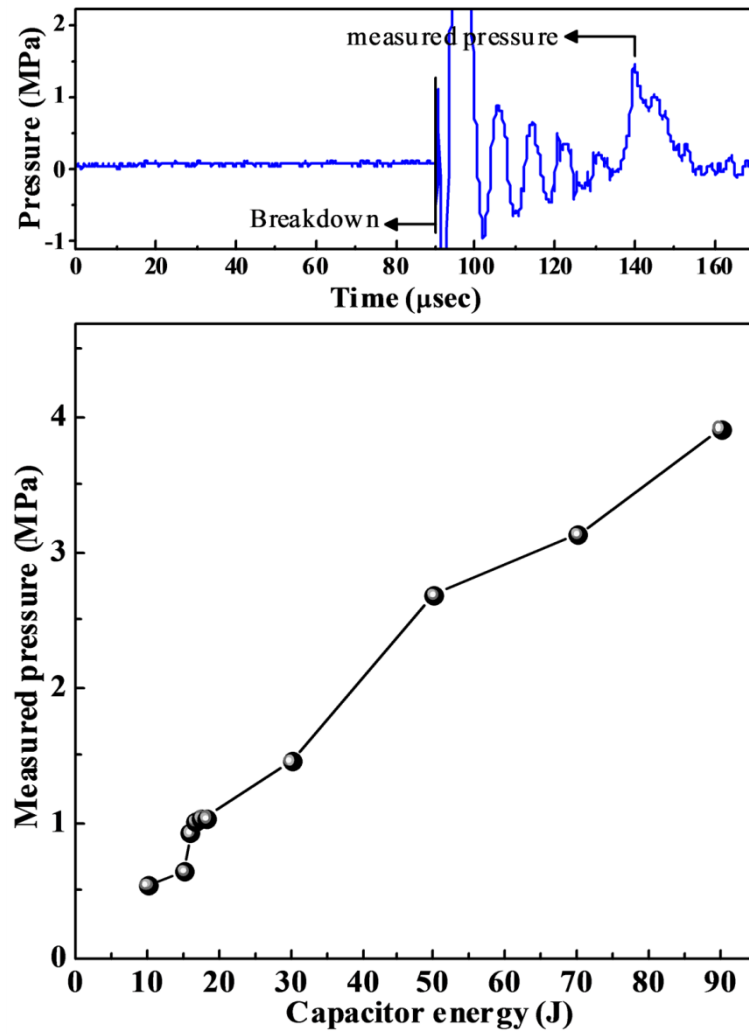

Fig. S3 (a) Pressure waveforms of arc discharge for capacitor energy of 30 J. The pressure peak of shock wave appears  $\sim 48 \mu\text{sec}$  after breakdown considering the sound velocity ( $1.144 \text{ mm } \mu\text{sec}^{-1}$ ) and the distance (55 mm) from the center of discharge chamber. (b) Pressure of shock wave as a function of capacitor energy.
